# Supplementary material for: Functional Implication of Dp71 in Osmoregulation and Vascular Permeability of the Retina
Source: PubMed Central journal article supplement (PMC2754330; doi:10.1371/journal.pone.0007329), 2009-10-07

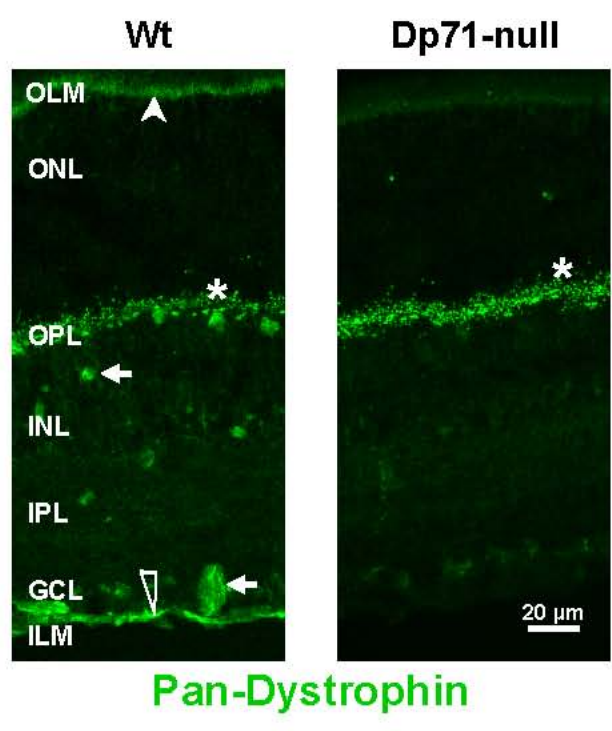

Supplement: pone.0007329.s002.pdf [file pone.0007329.s002.pdf]
